# Supplementary material for: The determination of the thermodynamic constants of MgUO2(CO3)32−complex in NaClO4and NaCl media by time-resolved luminescence spectroscopy, and applications in different geochemical contexts
Source: Royal Society of Chemistry journal article supplement (doi:10.1039/d0dt04124f), 2021-01-01
Supplement: d0dt04124f1.pdf [file d0dt04124f1.pdf]

## Supporting Information

Thermodynamic constants of  $\text{MgUO}_2(\text{CO}_3)_3^{2-}$  complex in  $\text{NaClO}_4$  and  $\text{NaCl}$  media using time-resolved luminescence spectroscopy, and applications to different geochemical contexts.

*Chengming Shang and Pascal E. Reiller\**.

Université Paris-Saclay, CEA, Service d'Études Analytiques et de Réactivité des Surfaces (SEARS), F-91191 Gif-sur-Yvette CEDEX, France.

Uranium; Carbonate; Ternary magnesium-uranyl-carbonate complexes; Luminescence.

\*Email [pascal.reiller@cea.fr](mailto:pascal.reiller@cea.fr)

Number of tables: 10

Number of figures: 6

Table S1. Potential values  $E_{\text{mes}}$  read on pH-meter for NaCl solutions of  $I_m = 0.01$  m to 3.19 m at  $\text{pH} = 2$  using the combined-glass electrode with the filling solution of saturated KCl: liquid junction potentials  $\Delta E_{\text{mes}}$  calculated to estimate the potential differences between the solution of  $I_m = 3.19$  m and those of different  $I_m$ ;  $\Delta E_{\text{mes}}$  then used in the four-point calibration with commercial buffer solution of  $\text{pH} 1.64, 4.01, 6.87, 9.18$ , assumed as diluted solutions of  $I_m \approx 0.01$  m.

| Solution                    | Conversion factor<br>(from molarity M to molality m) | $I_m$ (mol $\text{kg}_w^{-1}$ ) | $E_{\text{mes}}$ (mV) | $\Delta E_{\text{mes}} = E_{\text{mes}} (I_m = 3.19 \text{ m}) - E_{\text{mes}}$ |
|-----------------------------|------------------------------------------------------|---------------------------------|-----------------------|----------------------------------------------------------------------------------|
| HCl 0.01 M<br>+ NaCl 2.99 M | 1.0668 <sup>a</sup>                                  | 3.19                            | 299.5                 | 0.0                                                                              |
| HCl 0.01 M<br>+ NaCl 1.49 M | 1.0319 <sup>a</sup>                                  | 1.56                            | 286                   | 13.5                                                                             |
| HCl 0.01 M<br>+ NaCl 0.99 M | 1.0215 <sup>a</sup>                                  | 1.04                            | 280.8                 | 18.7                                                                             |
| HCl 0.01M<br>+ NaCl 0.74 M  | 1.0165 <sup>a</sup>                                  | 0.76                            | 279.7                 | 19.8                                                                             |
| HCl 0.01 M<br>+ NaCl 0.59 M | 1.0135 <sup>b</sup>                                  | 0.61                            | 277.9                 | 21.6                                                                             |
| HCl 0.01 M<br>+ NaCl 0.49 M | 1.0118 <sup>a</sup>                                  | 0.51                            | 277.8                 | 21.7                                                                             |
| HCl 0.01 M<br>+ NaCl 0.41 M | 1.0092 <sup>b</sup>                                  | 0.42                            | 276.7                 | 22.8                                                                             |
| HCl 0.01M<br>+ NaCl 0.29M   | 1.0064 <sup>b</sup>                                  | 0.30                            | 276.5                 | 23.0                                                                             |
| HCl 0.01M<br>+ NaCl 0.19M   | 1.0040 <sup>b</sup>                                  | 0.20                            | 276.4                 | 23.1                                                                             |
| HCl 0.01M<br>+ NaCl 0.11M   | 1.0020 <sup>b</sup>                                  | 0.12                            | 275.4                 | 24.1                                                                             |
| HCl 0.01M                   | 1.0000                                               | 0.01                            | 275.0                 | 24.5                                                                             |

The conversion factor was taken as 1 for the solution of  $I_m = 0.01$  M,. The factor values for the solutions of  $I_m \geq 0.1$  M were either <sup>a</sup>taken from Guillaumont et al.<sup>1</sup> or <sup>b</sup>extrapolated from these known values.

Table S2. Experimental sample information – pH values, calculated Ringböm coefficients  $\alpha$ ,  $[\text{Mg}^{2+}]$  ( $\text{mol}\cdot\text{kg}_w^{-1}$ ) and deduced  $F_0$  and  $\tau$ ; the sample solutions giving the slope of 1 are set in *italics*.

| $I_m$<br>$\text{NaClO}_4$<br>( $\text{mol}\cdot\text{kg}_w^{-1}$ ) | 0.10     |          |                                                             |                |             | 0.51     |          |                                                             |                |             |
|--------------------------------------------------------------------|----------|----------|-------------------------------------------------------------|----------------|-------------|----------|----------|-------------------------------------------------------------|----------------|-------------|
| Sample                                                             | pH value | $\alpha$ | $[\text{Mg}^{2+}]$<br>( $\text{mol}\cdot\text{kg}_w^{-1}$ ) | $F_0$ (counts) | $\tau$ (ns) | pH value | $\alpha$ | $[\text{Mg}^{2+}]$<br>( $\text{mol}\cdot\text{kg}_w^{-1}$ ) | $F_0$ (counts) | $\tau$ (ns) |
| 1                                                                  | 9.00     | 1.00     | 0                                                           | 1.60E+07       | 8.59        | 9.00     | 1.00     | 0                                                           | 2.23E+07       | 10.42       |
| 2                                                                  | 8.45     | 1.02     | 1.76E-04                                                    | 1.83E+07       | 13.28       | 8.23     | 1.05     | 9.46E-03                                                    | 3.68E+07       | 11.46       |
| 3                                                                  | 8.30     | 1.06     | 4.50E-04                                                    | 2.29E+07       | 12.21       | 8.16     | 1.07     | 1.93E-02                                                    | 3.17E+07       | 12.65       |
| 4                                                                  | 8.23     | 1.12     | 1.57E-03                                                    | 1.58E+07       | 16.71       | 8.09     | 1.03     | 2.14E-02                                                    | 2.04E+07       | 14.74       |
| 5                                                                  | 8.20     | 1.17     | 2.12E-03                                                    | 1.59E+07       | 16.24       | 7.89     | 1.15     | 2.69E-02                                                    | 3.16E+07       | 13.79       |
| 6                                                                  | 8.09     | 1.45     | 4.45E-03                                                    | 1.61E+07       | 23.44       | 7.82     | 1.34     | 3.61E-02                                                    | 3.12E+07       | 15.75       |
| 7                                                                  | 8.06     | 1.62     | 6.82E-03                                                    | 2.07E+07       | 27.92       | 7.71     | 2.11     | 4.69E-02                                                    | 2.08E+07       | 19.50       |
| 8                                                                  | 8.01     | 3.71     | 1.35E-02                                                    | 2.36E+07       | 28.39       | 7.66     | 2.82     | 6.45E-02                                                    | 2.58E+07       | 20.56       |
| 9                                                                  | 7.84     | 6.17     | 2.36E-02                                                    | 2.43E+07       | 31.61       | 7.62     | 3.65     | 1.13E-01                                                    | 2.61E+07       | 23.21       |
| 10                                                                 | 7.76     | 10.78    | 4.18E-02                                                    | 2.79E+07       | 33.48       | 7.58     | 4.81     | 1.16E-01                                                    | 2.99E+07       | 25.55       |
| 11                                                                 | 7.73     | 14.18    | 6.41E-02                                                    | 3.45E+07       | 34.83       | 7.53     | 6.91     | 1.87E-01                                                    | 3.35E+07       | 26.53       |
| $I_m$<br>$\text{NaClO}_4$<br>( $\text{mol}\cdot\text{kg}_w^{-1}$ ) | 1.05     |          |                                                             |                |             | 1.62     |          |                                                             |                |             |
| Sample                                                             | pH value | $\alpha$ | $[\text{Mg}^{2+}]$<br>( $\text{mol}\cdot\text{kg}_w^{-1}$ ) | $F_0$ (counts) | $\tau$ (ns) | pH value | $\alpha$ | $[\text{Mg}^{2+}]$<br>( $\text{mol}\cdot\text{kg}_w^{-1}$ ) | $F_0$ (counts) | $\tau$ (ns) |
| 1                                                                  | 9.00     | 1        | 0                                                           | 3.33E+07       | 10.28       | 9.00     | 1.00     | 0                                                           | 5.44E+07       | 8.19        |
| 2                                                                  | 8.45     | 1.01     | 1.00E-03                                                    | 2.49E+07       | 12.43       | 8.70     | 1.01     | 9.38E-04                                                    | 3.56E+07       | 11.35       |
| 3                                                                  | 8.30     | 1.02     | 5.12E-03                                                    | 2.57E+07       | 13.38       | 8.22     | 1.02     | 2.37E-02                                                    | 4.32E+07       | 15.04       |
| 4                                                                  | 8.23     | 1.05     | 1.60E-02                                                    | 2.57E+07       | 13.38       | 8.18     | 1.05     | 5.52E-02                                                    | 4.49E+07       | 17.32       |
| 5                                                                  | 8.16     | 1.06     | 2.02E-02                                                    | 1.88E+07       | 16.22       | 8.09     | 1.06     | 1.43E-02                                                    | 4.23E+07       | 14.30       |
| 6                                                                  | 7.70     | 1.27     | 2.68E-02                                                    | 2.65E+07       | 15.07       | 7.98     | 1.02     | 2.32E-02                                                    | 4.20E+07       | 15.54       |
| 7                                                                  | 7.67     | 1.38     | 3.44E-02                                                    | 2.36E+07       | 17.83       | 7.89     | 1.02     | 2.60E-02                                                    | 3.74E+07       | 17.42       |
| 8                                                                  | 7.64     | 1.54     | 4.50E-02                                                    | 2.51E+07       | 18.62       | 7.78     | 1.06     | 3.36E-02                                                    | 4.13E+07       | 18.62       |
| 9                                                                  | 7.61     | 1.74     | 6.30E-02                                                    | 2.75E+07       | 19.86       | 7.69     | 1.11     | 4.55E-02                                                    | 4.11E+07       | 20.13       |
| 10                                                                 | 7.58     | 2.02     | 7.43E-02                                                    | 2.52E+07       | 22.79       | 7.64     | 1.21     | 6.19E-02                                                    | 4.67E+07       | 23.50       |
| 11                                                                 | 7.54     | 2.53     | 9.44E-02                                                    | 3.18E+07       | 22.99       | 7.56     | 1.54     | 8.60E-02                                                    | 4.67E+07       | 22.17       |
| 12                                                                 | 7.51     | 3.05     | 1.20E-01                                                    | 3.27E+07       | 26.04       | 7.50     | 2.06     | 1.08E-01                                                    | 5.05E+07       | 23.72       |
| 13                                                                 | 7.48     | 3.73     | 1.46E-01                                                    | 3.54E+07       | 27.08       | 7.47     | 2.53     | 1.39E-01                                                    | 5.80E+07       | 24.88       |
| $I_m$<br>$\text{NaClO}_4$<br>( $\text{mol}\cdot\text{kg}_w^{-1}$ ) | 2.21     |          |                                                             |                |             |          |          |                                                             |                |             |
| Sample                                                             | pH value | $\alpha$ | $[\text{Mg}^{2+}]$<br>( $\text{mol}\cdot\text{kg}_w^{-1}$ ) | $F_0$ (counts) | $\tau$ (ns) |          |          |                                                             |                |             |
| 1                                                                  | 9.00     | 1.00     | 0                                                           | 3.86E+07       | 9.27        |          |          |                                                             |                |             |
| 2                                                                  | 8.30     | 1.02     | 3.11E-03                                                    | 3.19E+07       | 10.77       |          |          |                                                             |                |             |
| 3                                                                  | 8.23     | 1.05     | 1.53E-02                                                    | 3.80E+07       | 10.40       |          |          |                                                             |                |             |
| 4                                                                  | 8.16     | 1.06     | 4.31E-02                                                    | 3.19E+07       | 12.31       |          |          |                                                             |                |             |
| 5                                                                  | 7.85     | 1.02     | 5.86E-02                                                    | 3.27E+07       | 13.60       |          |          |                                                             |                |             |
| 6                                                                  | 7.70     | 1.07     | 6.50E-02                                                    | 3.32E+07       | 15.74       |          |          |                                                             |                |             |
| 7                                                                  | 7.59     | 1.23     | 7.89E-02                                                    | 3.47E+07       | 16.70       |          |          |                                                             |                |             |
| 8                                                                  | 7.54     | 1.40     | 9.80E-02                                                    | 3.23E+07       | 19.15       |          |          |                                                             |                |             |
| 9                                                                  | 7.51     | 1.57     | 1.31E-01                                                    | 3.71E+07       | 20.27       |          |          |                                                             |                |             |
| 10                                                                 | 7.49     | 1.71     | 1.59E-01                                                    | 3.64E+07       | 27.86       |          |          |                                                             |                |             |
| 11                                                                 | 7.46     | 1.98     | 1.80E-01                                                    | 4.38E+07       | 25.32       |          |          |                                                             |                |             |
| 12                                                                 | 7.43     | 2.34     | 2.11E-01                                                    | 4.45E+07       | 28.66       |          |          |                                                             |                |             |

Table S2 (continued)

| $I_m$<br>NaCl<br>(mol·kg <sub>w</sub> <sup>-1</sup> ) | 0.10        |          |                                                             |                         |             | 0.25        |          |                                                             |                         |             |
|-------------------------------------------------------|-------------|----------|-------------------------------------------------------------|-------------------------|-------------|-------------|----------|-------------------------------------------------------------|-------------------------|-------------|
| Sample                                                | pH<br>value | $\alpha$ | [Mg <sup>2+</sup> ]<br>(mol·kg <sub>w</sub> <sup>-1</sup> ) | F <sub>0</sub> (counts) | $\tau$ (ns) | pH<br>value | $\alpha$ | [Mg <sup>2+</sup> ]<br>(mol·kg <sub>w</sub> <sup>-1</sup> ) | F <sub>0</sub> (counts) | $\tau$ (ns) |
| 1                                                     | 9.17        | 1.00     | 0                                                           | 2.61E+07                | 9.16        | 9.00        | 1.00     | 0                                                           | 4.82E+07                | 9.93        |
| 2                                                     | 8.26        | 1.09     | 3.48E-04                                                    | 2.82E+07                | 13.15       | 8.30        | 1.05     | 8.23E-04                                                    | 4.52E+07                | 9.72        |
| 3                                                     | 8.22        | 1.12     | 7.32E-04                                                    | 2.37E+07                | 14.38       | 8.23        | 1.04     | 1.72E-03                                                    | 2.49E+07                | 13.59       |
| 4                                                     | 8.07        | 1.49     | 1.25E-03                                                    | 2.23E+07                | 18.58       | 8.00        | 1.20     | 2.79E-03                                                    | 2.54E+07                | 15.33       |
| 5                                                     | 8.05        | 1.64     | 1.49E-03                                                    | 2.49E+07                | 19.11       | 7.95        | 1.31     | 3.66E-03                                                    | 2.76E+07                | 15.61       |
| 6                                                     | 8.00        | 2.08     | 2.38E-03                                                    | 2.62E+07                | 20.35       | 7.88        | 1.70     | 4.08E-03                                                    | 2.97E+07                | 15.79       |
| 7                                                     | 7.90        | 3.80     | 4.16E-03                                                    | 2.90E+07                | 23.99       | 7.81        | 2.42     | 6.10E-03                                                    | 3.23E+07                | 15.60       |
| 8                                                     | 7.87        | 4.80     | 6.36E-03                                                    | 3.30E+07                | 25.72       | 7.79        | 2.73     | 8.46E-03                                                    | 3.22E+07                | 18.31       |
| 9                                                     | 7.78        | 8.90     | 1.56E-02                                                    | 3.51E+07                | 28.22       | 7.77        | 3.16     | 1.02E-02                                                    | 3.42E+07                | 20.05       |
| 10                                                    | 7.74        | 12.13    | 2.50E-02                                                    | 4.59E+07                | 28.30       | 7.75        | 3.50     | 1.27E-02                                                    | 3.85E+07                | 20.36       |
| 11                                                    |             |          |                                                             |                         |             | 7.73        | 4.03     | 1.65E-02                                                    | 3.83E+07                | 22.22       |
| 12                                                    |             |          |                                                             |                         |             | 7.70        | 5.01     | 2.10E-02                                                    | 4.05E+07                | 23.07       |
| $I_m$<br>NaCl<br>(mol·kg <sub>w</sub> <sup>-1</sup> ) | 0.50        |          |                                                             |                         |             | 0.75        |          |                                                             |                         |             |
| Sample                                                | pH<br>value | $\alpha$ | [Mg <sup>2+</sup> ]<br>(mol·kg <sub>w</sub> <sup>-1</sup> ) | F <sub>0</sub> (counts) | $\tau$ (ns) | pH<br>value | $\alpha$ | [Mg <sup>2+</sup> ]<br>(mol·kg <sub>w</sub> <sup>-1</sup> ) | F <sub>0</sub> (counts) | $\tau$ (ns) |
| 1                                                     | 9.00        | 1.00     | 0                                                           | 7.96E+07                | 7.91        | 9.00        | 1.00     | 0                                                           | 5.03E+07                | 9.48        |
| 2                                                     | 8.45        | 1.01     | 8.50E-04                                                    | 8.48E+07                | 8.97        | 8.45        | 1.01     | 8.19E-04                                                    | 6.70E+07                | 9.59        |
| 3                                                     | 7.95        | 1.09     | 5.91E-03                                                    | 3.88E+07                | 11.65       | 8.30        | 1.02     | 3.17E-03                                                    | 6.21E+07                | 9.63        |
| 4                                                     | 7.87        | 1.19     | 6.34E-03                                                    | 2.97E+07                | 13.09       | 7.90        | 1.08     | 6.39E-03                                                    | 5.82E+07                | 9.93        |
| 5                                                     | 7.75        | 1.70     | 7.37E-03                                                    | 3.60E+07                | 13.09       | 7.82        | 1.14     | 2.87E-02                                                    | 4.83E+07                | 11.22       |
| 6                                                     | 7.70        | 2.20     | 9.57E-03                                                    | 3.22E+07                | 14.37       | 7.73        | 1.38     | 3.61E-02                                                    | 5.51E+07                | 10.75       |
| 7                                                     | 7.68        | 2.45     | 1.50E-02                                                    | 3.25E+07                | 15.11       | 7.68        | 1.68     | 5.03E-02                                                    | 5.64E+07                | 11.11       |
| 8                                                     | 7.63        | 3.35     | 1.93E-02                                                    | 2.86E+07                | 17.26       | 7.65        | 1.94     | 6.23E-02                                                    | 5.74E+07                | 11.65       |
| 9                                                     | 7.60        | 4.17     | 2.32E-02                                                    | 3.58E+07                | 16.70       | 7.62        | 2.29     | 7.72E-02                                                    | 5.83E+07                | 12.28       |
| 10                                                    | 7.59        | 4.36     | 3.07E-02                                                    | 3.44E+07                | 17.94       | 7.59        | 2.73     | 8.44E-02                                                    | 5.23E+07                | 13.18       |
| 11                                                    | 7.57        | 5.05     | 4.07E-02                                                    | 4.85E+07                | 19.69       | 7.57        | 3.12     | 9.54E-02                                                    | 5.12E+07                | 14.26       |
| 12                                                    | 7.55        | 5.89     | 6.08E-02                                                    | 5.98E+07                | 18.11       | 7.55        | 3.57     | 1.10E-01                                                    | 6.07E+07                | 13.48       |
| $I_m$<br>NaCl<br>(mol·kg <sub>w</sub> <sup>-1</sup> ) | 1.00        |          |                                                             |                         |             |             |          |                                                             |                         |             |
| Sample                                                | pH<br>value | $\alpha$ | [Mg <sup>2+</sup> ]<br>(mol·kg <sub>w</sub> <sup>-1</sup> ) | F <sub>0</sub> (counts) | $\tau$ (ns) |             |          |                                                             |                         |             |
| 1                                                     | 9.00        | 1.00     | 0                                                           | 1.16E+08                | 7.44        |             |          |                                                             |                         |             |
| 2                                                     | 8.45        | 1.01     | 7.92E-04                                                    | 7.43E+07                | 8.58        |             |          |                                                             |                         |             |
| 3                                                     | 8.30        | 1.03     | 3.00E-03                                                    | 6.40E+07                | 8.84        |             |          |                                                             |                         |             |
| 4                                                     | 8.23        | 1.03     | 1.18E-02                                                    | 6.22E+07                | 9.36        |             |          |                                                             |                         |             |
| 5                                                     | 8.16        | 1.03     | 1.71E-02                                                    | 4.17E+07                | 10.73       |             |          |                                                             |                         |             |
| 6                                                     | 7.71        | 1.14     | 2.85E-02                                                    | 6.38E+07                | 10.16       |             |          |                                                             |                         |             |
| 7                                                     | 7.68        | 1.24     | 3.21E-02                                                    | 7.95E+07                | 9.40        |             |          |                                                             |                         |             |
| 8                                                     | 7.65        | 1.38     | 4.22E-02                                                    | 7.53E+07                | 10.44       |             |          |                                                             |                         |             |
| 9                                                     | 7.61        | 1.64     | 5.67E-02                                                    | 8.12E+07                | 10.20       |             |          |                                                             |                         |             |
| 10                                                    | 7.53        | 2.59     | 6.65E-02                                                    | 5.81E+07                | 12.89       |             |          |                                                             |                         |             |
| 11                                                    | 7.52        | 2.78     | 7.83E-02                                                    | 6.96E+07                | 12.48       |             |          |                                                             |                         |             |
| 12                                                    | 7.50        | 3.20     | 1.05E-01                                                    | 7.25E+07                | 12.65       |             |          |                                                             |                         |             |

Table S3 .Characteristic decomposition parameters of the luminescence spectrum in Fig 4 of the main text.

| Peak Index | Area Fit | Center Max | Max Height | FWHM  |
|------------|----------|------------|------------|-------|
| 1          | 8.94E+06 | 464.62     | 6.43E+04   | 13.06 |
| 2          | 2.19E+06 | 484.37     | 1.34E+05   | 15.50 |
| 3          | 2.02E+06 | 504.75     | 1.21E+05   | 15.74 |
| 4          | 1.16E+06 | 525.76     | 6.27E+04   | 17.29 |
| 5          | 4.68E+05 | 547.63     | 2.06E+04   | 21.32 |
| 6          | 3.25E+05 | 569.17     | 6.81E+03   | 44.75 |

Table S4. Formation constants  $\log_{10}K^0$  used in Fig. S1.

| $\log_{10}K^0$                               | Mg                | Ca                |
|----------------------------------------------|-------------------|-------------------|
| MCO <sub>3</sub> (aq)                        | 2.98 <sup>a</sup> | 3.22 <sup>b</sup> |
| MOH <sup>+</sup>                             | 2.32 <sup>c</sup> | 1.17 <sup>d</sup> |
| MF <sup>+</sup>                              | 1.35 <sup>a</sup> | 0.68 <sup>a</sup> |
| MSO <sub>4</sub> (aq)                        | 2.26 <sup>e</sup> | 2.02 <sup>f</sup> |
| MPO <sub>4</sub> <sup>-</sup>                | 4.85 <sup>g</sup> | 6.46 <sup>g</sup> |
| MHPO <sub>4</sub> (aq)                       | 2.88 <sup>g</sup> | 2.55 <sup>g</sup> |
| MH <sub>2</sub> PO <sub>4</sub> <sup>+</sup> | 1.17 <sup>g</sup> | 1.40 <sup>g</sup> |
| MSeO <sub>4</sub> (aq)                       | 2.2 <sup>h</sup>  | 2 <sup>h</sup>    |

<sup>a</sup> Sverjensky, *et al.*<sup>2</sup>; <sup>b</sup> Plummer and Busenberg<sup>3</sup>; <sup>c</sup> Palmer and Wesolowski<sup>4</sup>; <sup>d</sup> Shock, *et al.*<sup>5</sup>; <sup>e</sup> Wagman, *et al.*<sup>6</sup>; <sup>f</sup> Yeatts and Marshall<sup>7</sup>; <sup>g</sup> Turner, *et al.*<sup>8</sup>; <sup>h</sup> Olin, *et al.*<sup>9</sup>

Table S5. Evolutions of  $\log_{10}K^\circ$  values from  $\text{Mg}^{2+}$  to  $\text{Ba}^{2+}$  with different ligands, used in Fig. S2.

| $\log_{10}K^\circ_{1.1.3}$        | $\text{Mg}^{2+}$                                                          | $\text{Ca}^{2+}$                                                                          | $\text{Sr}^{2+}$  | $\text{Ba}^{2+}$   |
|-----------------------------------|---------------------------------------------------------------------------|-------------------------------------------------------------------------------------------|-------------------|--------------------|
| $\text{F}^-$                      | 1.35 <sup>a</sup>                                                         | 0.68 <sup>a</sup>                                                                         | 0.14 <sup>a</sup> | -0.18 <sup>a</sup> |
| $\text{OH}^-$                     | 2.32 <sup>b</sup>                                                         | 1.17 <sup>c</sup>                                                                         | 0.69 <sup>c</sup> | 0.49 <sup>d</sup>  |
| $\text{CO}_3^{2-}$                | 2.98 <sup>a</sup>                                                         | 3.22 <sup>e</sup>                                                                         | 2.81 <sup>f</sup> | 2.71 <sup>g</sup>  |
| $\text{Ox}^{2-}$                  | 3.43 <sup>h</sup>                                                         | 3.19 <sup>h</sup>                                                                         | 2.92 <sup>h</sup> | 2.93 <sup>h</sup>  |
| $\text{SO}_4^{2-}$                | 2.26 <sup>d</sup>                                                         | 2.02 <sup>i</sup>                                                                         | 2.30 <sup>j</sup> | 2.70 <sup>k</sup>  |
| $\text{S}_2\text{O}_3^{2-}$       | 1.84 <sup>l</sup>                                                         | 2.02 <sup>l</sup>                                                                         | 2.04 <sup>l</sup> | 2.3 <sup>l</sup>   |
| $\text{UO}_2(\text{CO}_3)_3^{4-}$ | 4.27 <sup>m</sup><br>4.73 p.w. in NaCl<br>4.43 p.w. in NaClO <sub>4</sub> | 5.34 <sup>m</sup><br>5.36 in NaCl <sup>n</sup><br>5.42 in NaClO <sub>4</sub> <sup>n</sup> | 5.02 <sup>n</sup> | 4.84 <sup>n</sup>  |

<sup>a</sup> Sverjensky, *et al.*<sup>2</sup>; <sup>b</sup> Palmer and Wesolowski<sup>4</sup>; <sup>c</sup> Shock, *et al.*<sup>5</sup>; <sup>d</sup> Wagman, *et al.*<sup>6</sup>; <sup>e</sup> Plummer and Busenberg<sup>3</sup>; <sup>f</sup> Busenberg, *et al.*<sup>10</sup>; <sup>g</sup> Busenberg and Plummer<sup>11</sup>; <sup>h</sup> Prapaipong, *et al.*<sup>12</sup>; <sup>i</sup> Yeatts and Marshall<sup>7</sup>; <sup>j</sup> Reardon and Armstrong<sup>13</sup>; <sup>k</sup> Reardon and Armstrong<sup>13</sup>; <sup>l</sup> Davies<sup>14</sup>; <sup>m</sup> Dong and Brooks<sup>15</sup>; <sup>n</sup> Shang and Reiller<sup>16</sup>

Table S6. Seawater composition from Millero, *et al.*<sup>17</sup>

|                              |                                   |
|------------------------------|-----------------------------------|
| Temp                         | 25°C                              |
| pH                           | 8.1                               |
| pe                           | 4                                 |
| Density (g/cm <sup>3</sup> ) | 1.023                             |
| Units                        | mol kg <sub>w</sub> <sup>-1</sup> |
| Na                           | 0.4861                            |
| Mg                           | 0.0547                            |
| Ca                           | 0.0106                            |
| K                            | 0.0106                            |
| Sr                           | 0.0001                            |
| Cl                           | 0.5658                            |
| S(6)                         | 0.0293                            |
| Br                           | 0.0018                            |
| F                            | 0.0001                            |
| U                            | 1.386E-08                         |



Table S7. Thermodynamic constants used in theoretical speciation of seawater case in Fig 8 of the main text and in Fig. S4.

|         |                        | $\text{CaUO}_2(\text{CO}_3)_3^{2-}$ | $\text{Ca}_2\text{UO}_2(\text{CO}_3)_3(\text{aq})$ | $\text{MgUO}_2(\text{CO}_3)_3^{2-}$ | $\text{Mg}_2\text{UO}_2(\text{CO}_3)_3(\text{aq})$ |
|---------|------------------------|-------------------------------------|----------------------------------------------------|-------------------------------------|----------------------------------------------------|
| Fig 8   | $\log_{10}\beta^\circ$ | 27.20 <sup>a</sup>                  | 30.49 <sup>a</sup>                                 | 26.57 p.w.                          | /                                                  |
|         | $\epsilon$             | $0.29 \pm 0.11^a$                   | $0.66 \pm 0.12^a$                                  | $0.31 \pm 0.02$ p.w.                | /                                                  |
| Fig S4a | $\log_{10}\beta^\circ$ | 27.27 <sup>b</sup>                  | 29.81 <sup>b</sup>                                 | 25.8 <sup>c</sup>                   | 27.1 <sup>c</sup>                                  |
|         | $\epsilon$             | -0.02 <sup>b</sup>                  | 0 <sup>b</sup>                                     | -0.02 <sup>c</sup>                  | 0 <sup>c</sup>                                     |
| Fig S4b | $\log_{10}\beta^\circ$ | 27.18 <sup>d</sup>                  | 30.70 <sup>d</sup>                                 | 25.02 <sup>e</sup>                  | /                                                  |
|         | $\epsilon$             | -3 <sup>d</sup>                     | 0 <sup>d</sup>                                     | -3 <sup>e</sup>                     | /                                                  |

<sup>a</sup> Shang and Reiller<sup>16</sup>; <sup>b</sup> Lee and Yun<sup>18</sup>; <sup>c</sup> Lee, *et al.*<sup>19</sup>; <sup>d</sup> Dong and Brooks<sup>15</sup>; <sup>e</sup> Dong and Brooks<sup>20</sup>

Table S8 Thermodynamic constants used in theoretical speciation of Canadian aquitard case in Fig 9 of the main text and in Fig. S6.

|                    |                                                       | CaUO <sub>2</sub> (CO <sub>3</sub> ) <sub>3</sub> <sup>2-</sup> | Ca <sub>2</sub> UO <sub>2</sub> (CO <sub>3</sub> ) <sub>3</sub> (aq) | MgUO <sub>2</sub> (CO <sub>3</sub> ) <sub>3</sub> <sup>2-</sup> |
|--------------------|-------------------------------------------------------|-----------------------------------------------------------------|----------------------------------------------------------------------|-----------------------------------------------------------------|
| Fig 9a and Fig. S6 | log <sub>10</sub> K <sup>o</sup>                      | 5.36 <sup>a</sup>                                               | 8.65 <sup>a</sup>                                                    | 4.73 p.w.                                                       |
|                    | ε                                                     | 0.29 ± 0.11 <sup>a</sup>                                        | 0.66 ± 0.12 <sup>a</sup>                                             | 0.31 ± 0.02 p.w.                                                |
|                    | Δ <sub>r</sub> H <sub>m</sub> (KJ mol <sup>-1</sup> ) | -8 ± 6 <sup>b</sup>                                             | -8 ± 7 <sup>b</sup>                                                  | /                                                               |
|                    |                                                       | -1.2 ± 0.3 <sup>c</sup>                                         | -3.1 ± 3.0 <sup>c</sup>                                              | 4.3 ± 1.5 <sup>c</sup>                                          |
|                    | -4.6 (average)                                        | -5.55 (average)                                                 | 4.3 (average)                                                        |                                                                 |
| Fig 9b             | log <sub>10</sub> β <sup>o</sup>                      | 27.18 <sup>d</sup>                                              | 30.70 <sup>d</sup>                                                   | 25.02 <sup>e</sup>                                              |
|                    | ε                                                     | 0                                                               | 0                                                                    | -3.2                                                            |
|                    | Δ <sub>r</sub> H <sub>m</sub> (KJ mol <sup>-1</sup> ) | -47 <sup>b</sup>                                                | -47 <sup>b</sup>                                                     | /                                                               |

<sup>a</sup> Shang and Reiller<sup>16</sup>, <sup>b</sup> Endrizzi and Rao<sup>21</sup>; <sup>c</sup> Jo *et al.*<sup>22,23</sup>; <sup>d</sup> Dong and Brooks<sup>15</sup>; <sup>e</sup> Dong and Brooks<sup>20</sup>

Table S9. Compositions of selected Indian drinking water samples, collected from the work of Coyte, *et al.*<sup>24</sup>

| Description                           | Units | Jai-112 | Tonk-110 | Bundi-104 | Tonk-104 | Jai-24 |
|---------------------------------------|-------|---------|----------|-----------|----------|--------|
| Temperature                           | °C    | 29.6    | 29.7     | 27.1      | 29.1     | 30.5   |
| pH                                    |       | 7.4     | 7.15     | 7.68      | 7.55     | 6.83   |
| F                                     | mg/L  | 1.83    | 2.68     | 5.15      | 5.25     | 0      |
| Cl                                    | mg/L  | 293     | 314      | 388       | 1050     | 545    |
| Br                                    | mg/L  | 0.58    | 1.6      | 1.18      | 2.11     | 1.15   |
| I                                     | mg/L  | 0       | 0        | 1.512     | 0        | 0      |
| N(5) as NO <sub>3</sub> <sup>-</sup>  | mg/L  | 23.1    | 207      | 31.6      | 28.6     | 252    |
| S(6) as SO <sub>4</sub> <sup>2-</sup> | mg/L  | 166     | 119      | 337       | 400      | 90.3   |
| C(4) as HCO <sub>3</sub> <sup>-</sup> | mg/L  | 1530    | 737      | 970       | 1030     | 832    |
| Ca                                    | mg/L  | 13.9    | 38.9     | 20.5      | 14.9     | 212    |
| Mg                                    | mg/L  | 23      | 38       | 39.3      | 21.5     | 119    |
| Sr                                    | mg/L  | 0.99    | 1.45     | 0.92      | 1.58     | 2.89   |
| Na                                    | mg/L  | 800     | 484      | 700       | 1320     | 372    |
| Fe                                    | mg/L  | 0       | 0        | 0         | 0        | 0.53   |
| Ba                                    | mg/L  | 0.27    | 0.24     | 0.11      | 0.02     | 0.38   |
| Mn                                    | mg/L  | 0       | 0        | 0         | 0        | 0.45   |
| Si                                    | mg/L  | 10.5    | 26.8     | 12.4      | 6.31     | 23     |
| Li                                    | µg/L  | 0       | 11.26    | 30.35     | 31.33    | 13.28  |
| B                                     | µg/L  | 2310    | 754      | 2180      | 4140     | 893    |
| V                                     | µg/L  | 0       | 0        | 0         | 0        | 0      |
| Cr                                    | µg/L  | 0       | 0        | 0         | 0        | 0      |
| Ni                                    | µg/L  | 0       | 0        | 0         | 0        | 3.79   |
| Cu                                    | µg/L  | 0       | 0        | 0         | 0        | 20.69  |
| Zn                                    | µg/L  | 392.15  | 10.8     | 13.1      | 22.13    | 0      |
| As                                    | µg/L  | 0       | 0        | 0         | 0        | 0      |
| Se                                    | µg/L  | 0       | 0        | 0         | 0        | 0      |
| Mo                                    | µg/L  | 52.31   | 6.64     | 29.19     | 15.25    | 2.63   |
| Pb                                    | µg/L  | 0.69    | 0.52     | 0.63      | 1.06     | 0.34   |
| U                                     | µg/L  | 181.28  | 32.71    | 50.45     | 319.67   | 31.23  |

Table S10. Modeling of uranium speciation for selected Indian underground water samples.

| (a) Using Ilnl.dat <sup>25,26</sup> with $\log_{10}K^{\circ}_{n.1.3}$ from Dong and Brooks <sup>15,20</sup> as follows:                                                                              |                                     |                                                                             |                                     |                                   |       |
|------------------------------------------------------------------------------------------------------------------------------------------------------------------------------------------------------|-------------------------------------|-----------------------------------------------------------------------------|-------------------------------------|-----------------------------------|-------|
| $\log_{10}K^{\circ}_{1.1.3}(\text{CaUO}_2(\text{CO}_3)_3^{2-}) = 5.34$                                                                                                                               |                                     | $\log_{10}K^{\circ}_{1.1.3}(\text{MgUO}_2(\text{CO}_3)_3^{2-}) = 4.27$      |                                     |                                   |       |
| $\log_{10}K^{\circ}_{2.1.3}(\text{Ca}_2\text{UO}_2(\text{CO}_3)_3(\text{aq})) = 8.86$                                                                                                                |                                     | $\log_{10}K^{\circ}_{1.1.3}(\text{SrUO}_2(\text{CO}_3)_3^{2-}) = 5.02$      |                                     |                                   |       |
| Sample                                                                                                                                                                                               | $\text{CaUO}_2(\text{CO}_3)_3^{2-}$ | $\text{Ca}_2\text{UO}_2(\text{CO}_3)_3(\text{aq})$                          | $\text{MgUO}_2(\text{CO}_3)_3^{2-}$ | $\text{UO}_2(\text{CO}_3)_3^{4-}$ | Other |
| Jai-112                                                                                                                                                                                              | 54.9%                               | 12.8%                                                                       | 13.0%                               | 16.0%                             | 3.4%  |
| Tonk-110                                                                                                                                                                                             | 47.9%                               | 39.2%                                                                       | 6.6%                                | 3.3%                              | 2.9%  |
| Bundi-104                                                                                                                                                                                            | 54.6%                               | 18.8%                                                                       | 14.4%                               | 10.6%                             | 1.7%  |
| Tonk-104                                                                                                                                                                                             | 51.6%                               | 10.2%                                                                       | 10.3%                               | 24.2%                             | 3.7%  |
| Jai-24                                                                                                                                                                                               | 20.6%                               | 76.7%                                                                       | 1.7%                                | 0.4%                              | 0.5%  |
| (b) Using Thermochemie.dat ( <a href="http://www.thermochemie-tdb.com">http://www.thermochemie-tdb.com</a> ) with $\log_{10}\beta^{\circ}_{n.1.3}$ from Dong and Brooks <sup>15,20</sup> as follows: |                                     |                                                                             |                                     |                                   |       |
| $\log_{10}\beta^{\circ}_{1.1.3}(\text{CaUO}_2(\text{CO}_3)_3^{2-}) = 27.18$                                                                                                                          |                                     | $\log_{10}\beta^{\circ}_{1.1.3}(\text{MgUO}_2(\text{CO}_3)_3^{2-}) = 26.11$ |                                     |                                   |       |
| $\log_{10}\beta^{\circ}_{2.1.3}(\text{Ca}_2\text{UO}_2(\text{CO}_3)_3(\text{aq})) = 30.7$                                                                                                            |                                     | $\log_{10}\beta^{\circ}_{1.1.3}(\text{SrUO}_2(\text{CO}_3)_3^{2-}) = 26.86$ |                                     |                                   |       |
| Sample                                                                                                                                                                                               | $\text{CaUO}_2(\text{CO}_3)_3^{2-}$ | $\text{Ca}_2\text{UO}_2(\text{CO}_3)_3(\text{aq})$                          | $\text{MgUO}_2(\text{CO}_3)_3^{2-}$ | $\text{UO}_2(\text{CO}_3)_3^{4-}$ | Other |
| Jai-112                                                                                                                                                                                              | 58.5%                               | 12.9%                                                                       | 13.9%                               | 13.3%                             | 1.4%  |
| Tonk-110                                                                                                                                                                                             | 50.0%                               | 39.5%                                                                       | 6.9%                                | 2.7%                              | 0.9%  |
| Bundi-104                                                                                                                                                                                            | 56.0%                               | 17.8%                                                                       | 15.4%                               | 10.0%                             | 0.8%  |
| Tonk-104                                                                                                                                                                                             | 55.7%                               | 10.0%                                                                       | 11.4%                               | 21.2%                             | 1.8%  |
| Jai-24                                                                                                                                                                                               | 21.3%                               | 76.5%                                                                       | 1.7%                                | 0.3%                              | 0.2%  |

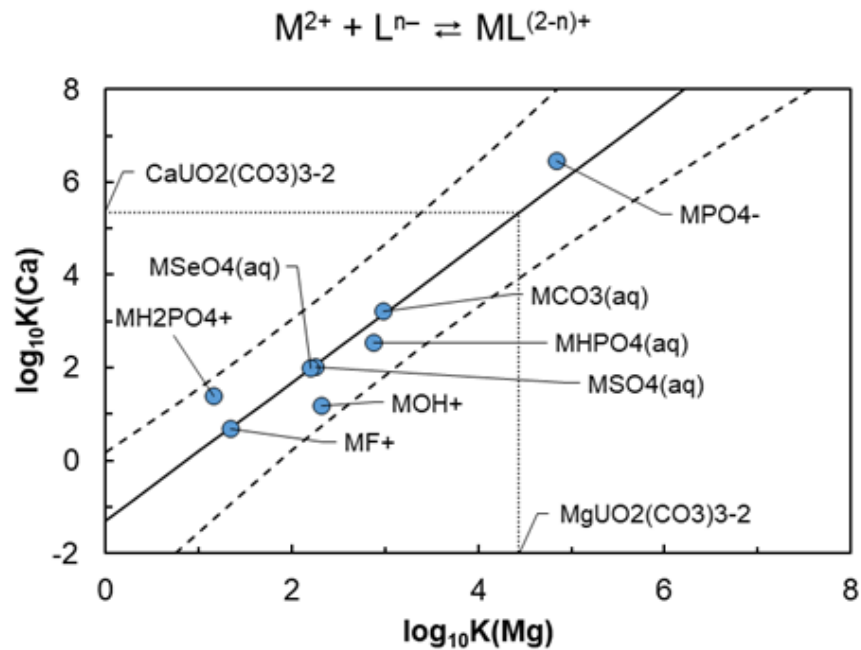

Fig. S1 Linear relationship between the formation constants  $\log_{10}K^\circ$  for Mg and Ca with different ligands. The values of  $\log_{10}K^\circ$  are listed in Table S4.

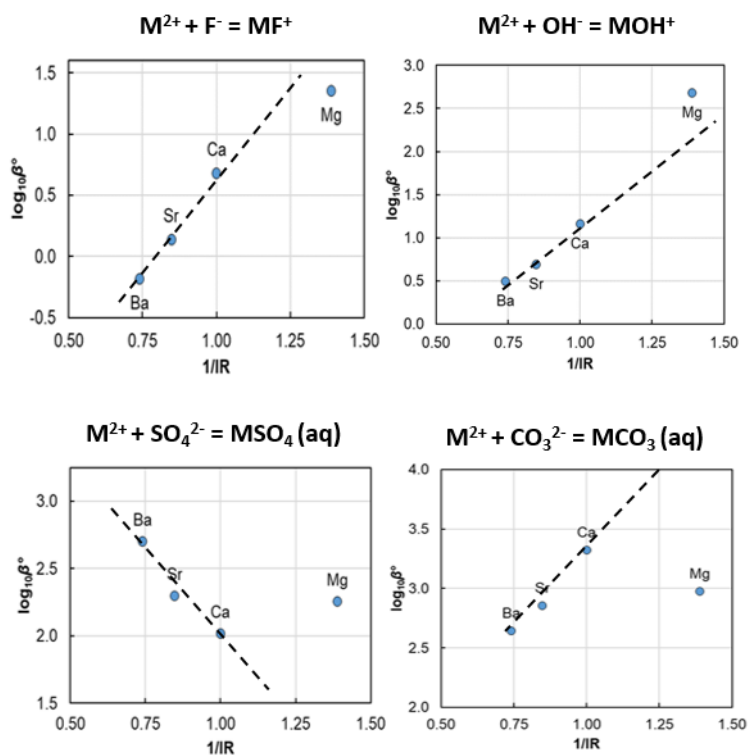

Fig. S2 Stability constants of alkali earth metal ions and different ligands –  $F^-$ ,  $OH^-$ ,  $SO_4^{2-}$ ,  $CO_3^{2-}$  – as a function of  $1/R$  with  $R$  being the size of the ionic radius. The values of  $\log_{10}K^\circ$  are listed in Table S5.

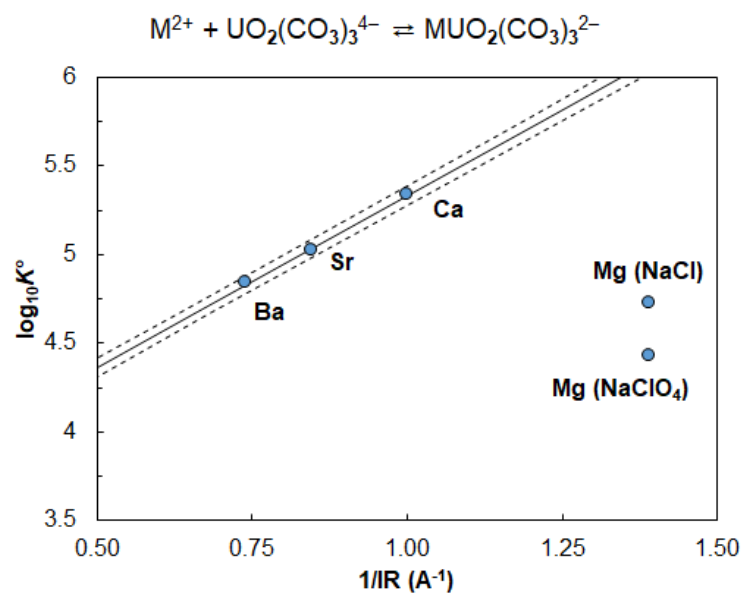

Fig. S3. Stability constants of alkaline earth metal ions and  $UO_2(CO_3)_3^{4-}$  as a function of  $1/R$  with  $R$  being the size of the ionic radius. The values of  $\log_{10}K^\ominus$  are listed in Table S5.

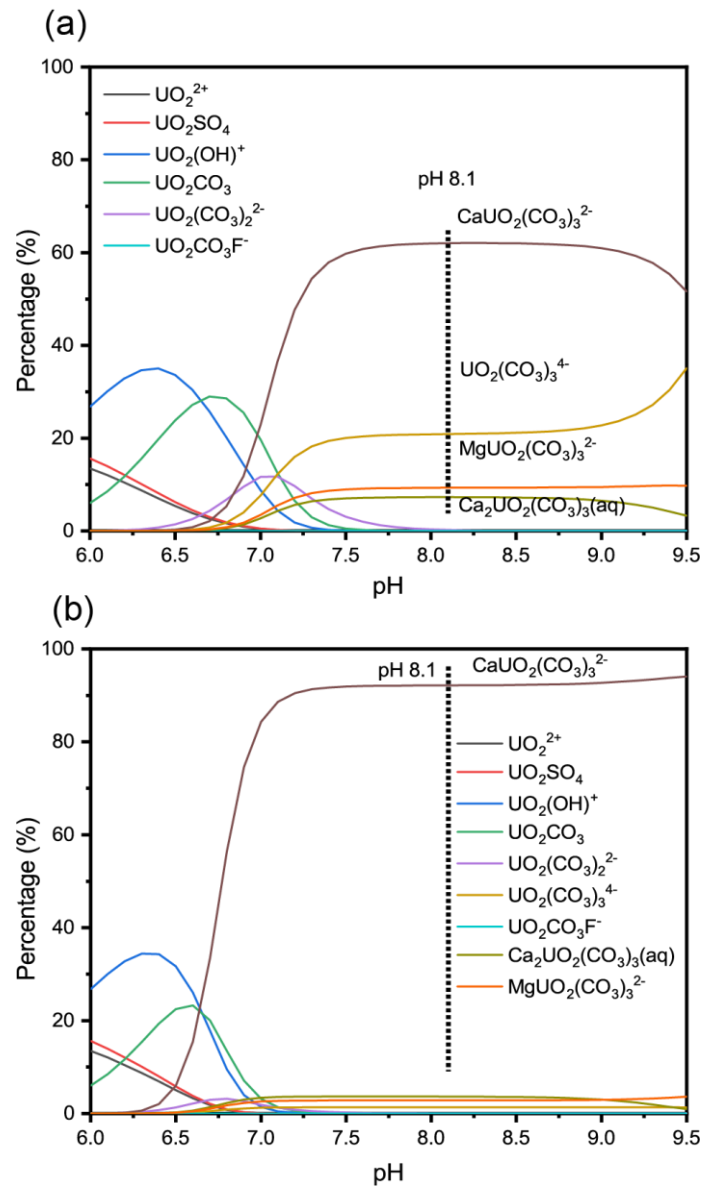

Fig. S4 Theoretical speciation of uranium in standard seawater (composition listed in Table S6) at  $P(\text{CO}_2) = 10^{-3.5}$  atm. Thermochemie 10a database was used in calculations by implementing the thermodynamic constants of  $\text{MgUO}_2(\text{CO}_3)_3^{2-}$ ,  $\text{Ca}_n\text{UO}_2(\text{CO}_3)_3^{(4-2n)-}$  listed in Table S7.

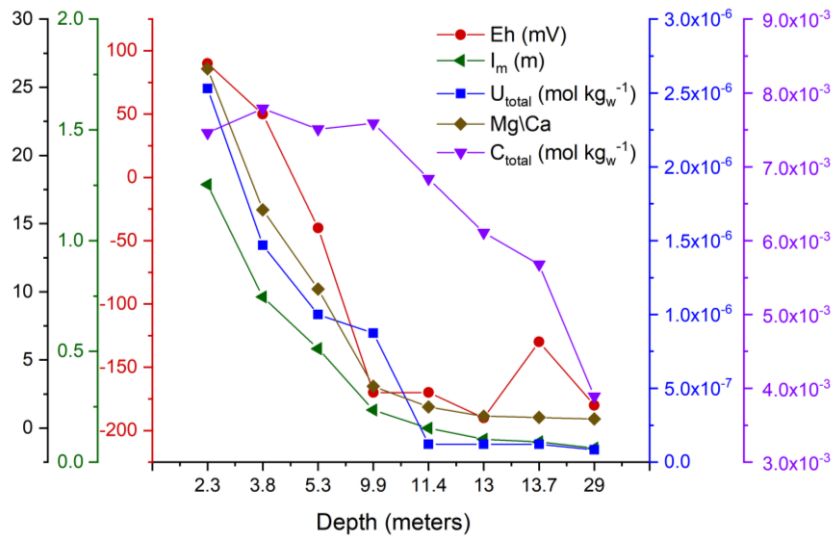

Fig. S5 Evolutions of principal parameters in the selected Canadian aquitard waters.<sup>27,28</sup>



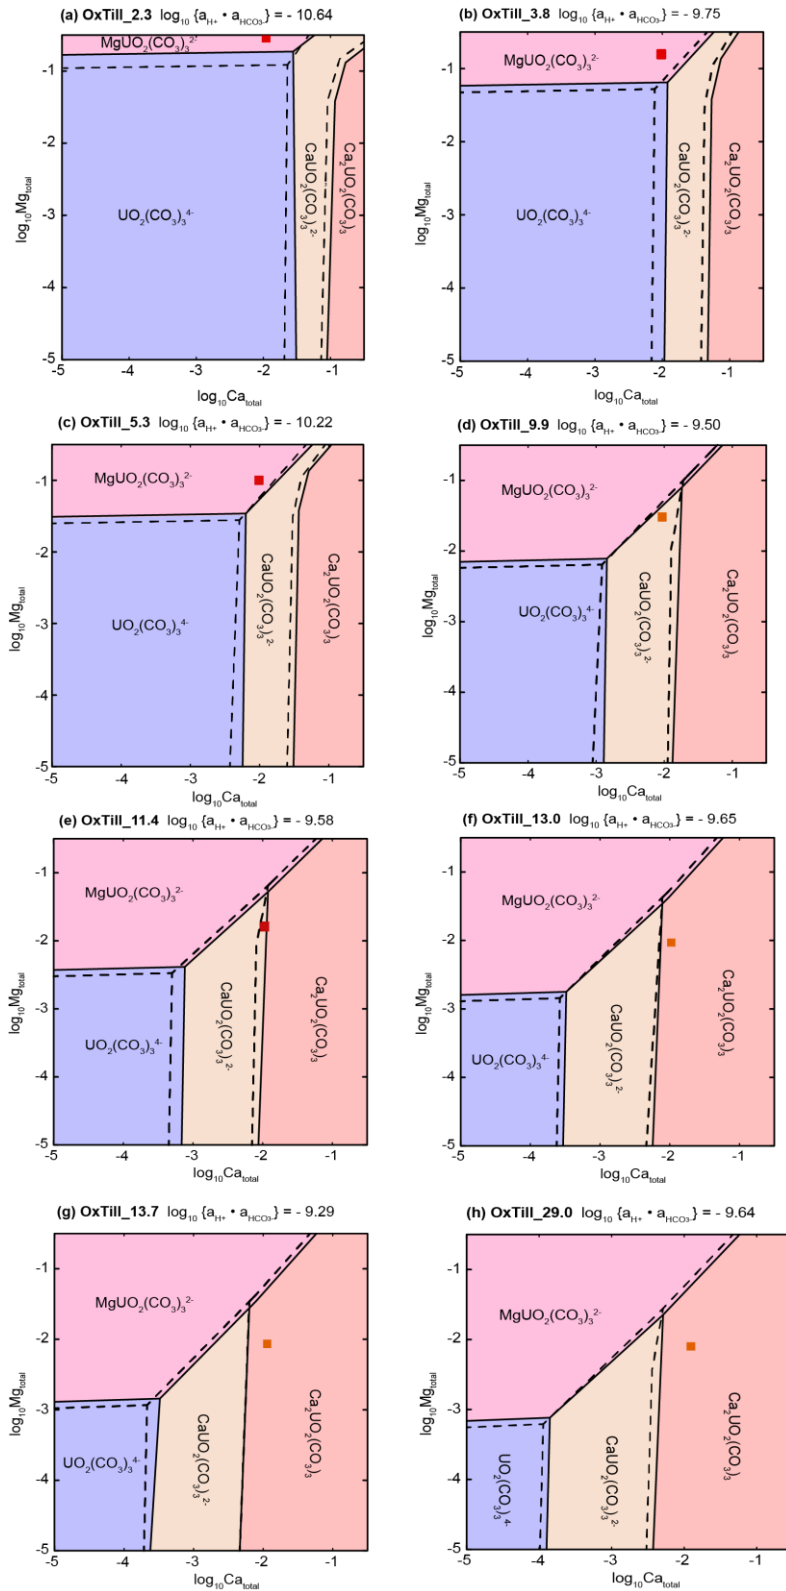

Fig. S6 Predominance plots of uranium species at the fixed values of  $\log_{10} \{a_{H^+} \cdot a_{HCO_3^-}\}$  corresponding to the aqueous conditions of the collected samples in Canadian aquitard site. Thermochemie 10a database file<sup>29</sup> and SIT ionic strength correction were used in calculations with implemented thermodynamic constants of  $MgUO_2(CO_3)_3^{2-}$ ,  $Ca_nUO_2(CO_3)_3^{(4-2n)-}$  listed in Table S8. The boundaries plotted in dashed lines represent the simulation results at 5°C and the solid lines at 25°C. The ionic strength varies from 1.38 mol  $kg_w^{-1}$  at 29 m to 0.06 mol  $kg_w^{-1}$  to at 2.3 m.

## References

1. R. Guillaumont, T. Fanghänel, V. Neck, J. Fuger, D. A. Palmer, I. Grenthe and M. H. Rand, *Update of the Chemical Thermodynamics of Uranium, Neptunium, Plutonium, Americium and Technetium*, OECD Nuclear Energy Agency, Data Bank, Issy-les-Moulineaux, France, 2003.
2. D. A. Sverjensky, E. L. Shock and H. C. Helgeson, *Geochimica et Cosmochimica Acta*, 1997, **61**, 1359-1412.
3. L. Plummer and E. Busenberg, *Geochim. Cosmochim. Acta*, 1982, **46**, 1011-1040.
4. D. A. Palmer and D. J. Wesolowski, *J. Solution Chem.*, 1997, **26**, 217-232.
5. E. L. Shock, D. C. Sassani, M. Willis and D. A. Sverjensky, *Geochimica et cosmochimica acta*, 1997, **61**, 907-950.
6. D. D. Wagman, W. H. Evans, V. B. Parker, R. H. Schumm and I. Halow, *J. Chem. Ref. Data*, 1982, **11**, 392.
7. L. B. Yeatts and W. L. Marshall, *J. Phys. Chem.*, 1969, **73**, 81-90.
8. D. R. Turner, M. Whitfield and A. Dickson, *Geochim. Cosmochim. Acta*, 1981, **45**, 855-881.
9. Å. Olin, B. Noläng, E. Osadchii, L.-O. Öhman and E. Rosén, *Chemical Thermodynamics of Selenium*, OECD Nuclear Energy Agency, Data Bank, Issy-les-Moulineaux, France, 2005.
10. E. Busenberg, L. N. Plummer and V. B. Parker, *Geochim. Cosmochim. Acta*, 1984, **48**, 2021-2035.
11. E. Busenberg and L. N. Plummer, *Geochim. Cosmochim. Acta*, 1986, **50**, 2225-2233.
12. P. Prapaipong, E. L. Shock and C. M. Koretsky, *Geochimica et Cosmochimica Acta*, 1999, **63**, 2547-2577.
13. E. J. Reardon and D. K. Armstrong, *Geochimica et Cosmochimica Acta*, 1987, **51**, 63-72.
14. C. W. Davies, in *The Structure of Electrolytic Solutions*, John Wiley and Sons, New York, 1959, pp. 19-34.
15. W. M. Dong and S. C. Brooks, *Environ. Sci. Technol.*, 2006, **40**, 4689-4695.
16. C. Shang and P. E. Reiller, *Dalton. Trans*, 2020, **49**, 466-481.
17. F. J. Millero, R. Feistel, D. G. Wright and T. J. McDougall, *Deep-Sea Res. Pt. I*, 2008, **55**, 50-72.
18. J. Y. Lee and J. I. Yun, *Dalton Trans.*, 2013, **42**, 9862-9869.
19. J. Y. Lee, M. Vespa, X. Gaona, K. Dardenne, J. Rothe, T. Rabung, M. Altmaier and J.-I. Yun, *Radiochim. Acta*, 2017, **105**.
20. W. Dong and S. C. Brooks, *Environ. Sci. Technol.*, 2008, **42**, 1979-1983.
21. F. Endrizzi and L. F. Rao, *Chem.-Eur. J.*, 2014, **20**, 14499-14506.
22. Y. Jo, A. Kirishima, S. Kimuro, H.-K. Kim and J.-I. Yun, *Dalton Trans.*, 2019, **48**, 6942-6950.
23. Y. Jo, H.-K. Kim and J.-I. Yun, *Dalton. Trans*, 2019, **48**, 14769-14776.
24. R. M. Coyte, R. C. Jain, S. K. Srivastava, K. C. Sharma, A. Khalil, L. Ma and A. Vengosh, *Environmental Science & Technology Letters*, 2018, **5**, 341-347.
25. D. L. Parkhurst and C. A. J. Appelo, *Description of Input and Examples for PHREEQC Version 3 — A Computer Program for Speciation, Batch-Reaction, One-Dimensional Transport, and Inverse Geochemical Calculations. Chapter 43 of Section A, Groundwater Book 6, Modeling Techniques*, U.S. Geological Survey, Denver, Colorado, USA, 2013. <http://pubs.usgs.gov/tm/06/a43/pdf/tm6-A43.pdf>

26. D. L. Parkhurst and C. A. J. Appelo, *User's Guide to PHREEQC (Version 2) — A Computer Program for Speciation, Batch-Reaction, One-Dimensional Transport, and Inverse Geochemical Calculations*, Report 99-4259, U.S. Geological Survey, Water-Resources Investigations, Lakewood, Colorado, USA, 1999.  
[http://wwwbrr.cr.usgs.gov/projects/GWC\\_coupled/phreeqci/](http://wwwbrr.cr.usgs.gov/projects/GWC_coupled/phreeqci/)
27. M. J. Hendry and L. I. Wassenaar, *Water Resour. Res.*, 2000, **36**, 503-513.
28. J. F. Ranville, M. J. Hendry, T. N. Reszat, Q. L. Xie and B. D. Honeyman, *J. Contam. Hydrol.*, 2007, **91**, 233-246.
29. Thermochimie, <http://www.thermochimie-tdb.com/>.
